# Supplementary material for: Development of a peptide-based lateral flow assay for the detection of the cancer biomarker Mdm2
Source: Royal Society of Chemistry journal article supplement (doi:10.1039/d3sd00253e), 2023-11-22
Supplement: d3sd00253e1.pdf [file d3sd00253e1.pdf]

## SUPPORTING INFORMATION

### Design of Peptide-based Lateral Flow Assay for the Detection of the Biomarker Mdm2

*Bryan Gosselin,<sup>†,‡</sup> Maurice Retout,<sup>†</sup> Ivan Jabin<sup>‡\*</sup> and Gilles Bruylants<sup>†,\*</sup>*

<sup>†</sup> Engineering of Molecular NanoSystems, Ecole Polytechnique de Bruxelles, Université libre de Bruxelles (ULB), avenue F. D. Roosevelt 50, CP165/64, B-1050 Brussels, Belgium

<sup>‡</sup> Laboratoire de Chimie Organique, Université libre de Bruxelles (ULB), Avenue F. D. Roosevelt 50, CP160/06, B-1050 Brussels, Belgium

[Ivan.Jabin@ulb.be](mailto:Ivan.Jabin@ulb.be); [Gilles.Bruylants@ulb.be](mailto:Gilles.Bruylants@ulb.be)

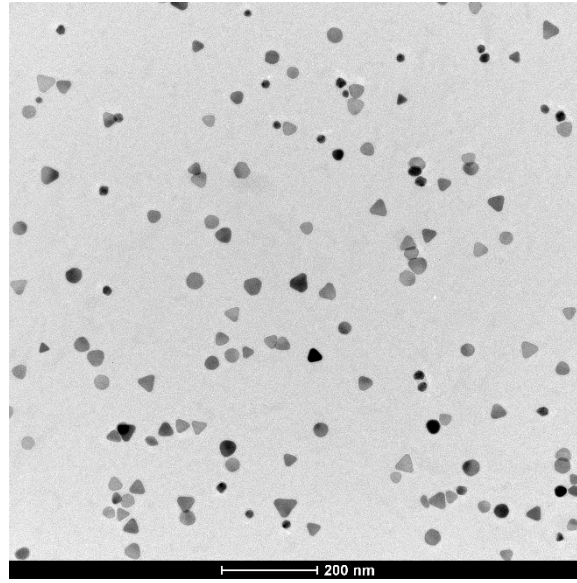

**Figure S1.** Additional TEM image of AgNPLs- $X_4$

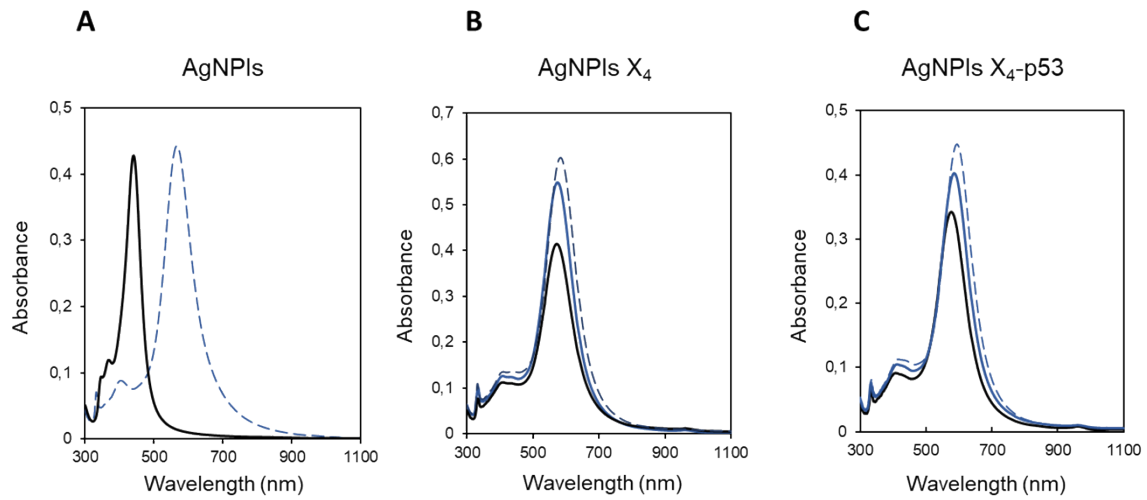

**Figure S2.** UV-Vis spectra of (a) AgNPLs after 5 minutes of suspension in either water (blue dashed line) or 0.1X (black full line), (b) AgNPLs- $X_4$  and (c) AgNPLs- $X_4$ -p53 after 2 hours of suspension in either water (blue dashed line), 0.5X (blue full line) or 1X PBS (black full line).

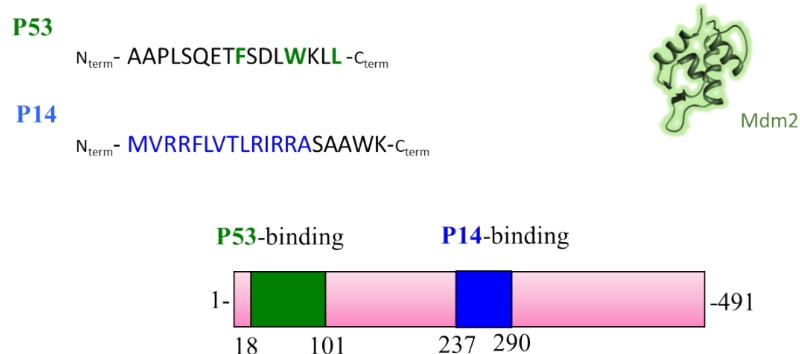

**Figure S3.** Amino acids sequence of peptide aptamers

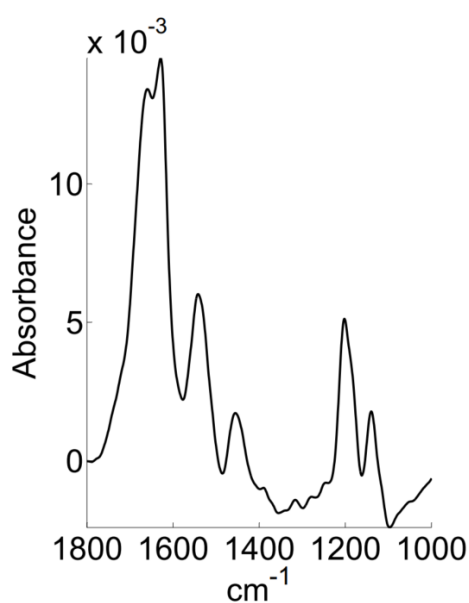

**Figure S4.** ATR-FTIR spectrum of p53 peptide. Characteristic peaks at  $1650 \text{ cm}^{-1}$  and  $1530 \text{ cm}^{-1}$  related to amide I and II band, respectively.

|                   | Hydrodynamic diameter | Zeta Potential         |
|-------------------|-----------------------|------------------------|
| AgNPIs $X_4$      | $34 \pm 1 \text{ nm}$ | $-52 \pm 2 \text{ mV}$ |
| AgNPIs $X_4$ -p53 | $39 \pm 1 \text{ nm}$ | $-52 \pm 4 \text{ mV}$ |

**Table S1.** DLS measurement and Zeta potential of AgNPIs- $X_4$  and AgNPIs- $X_4$ -p53.

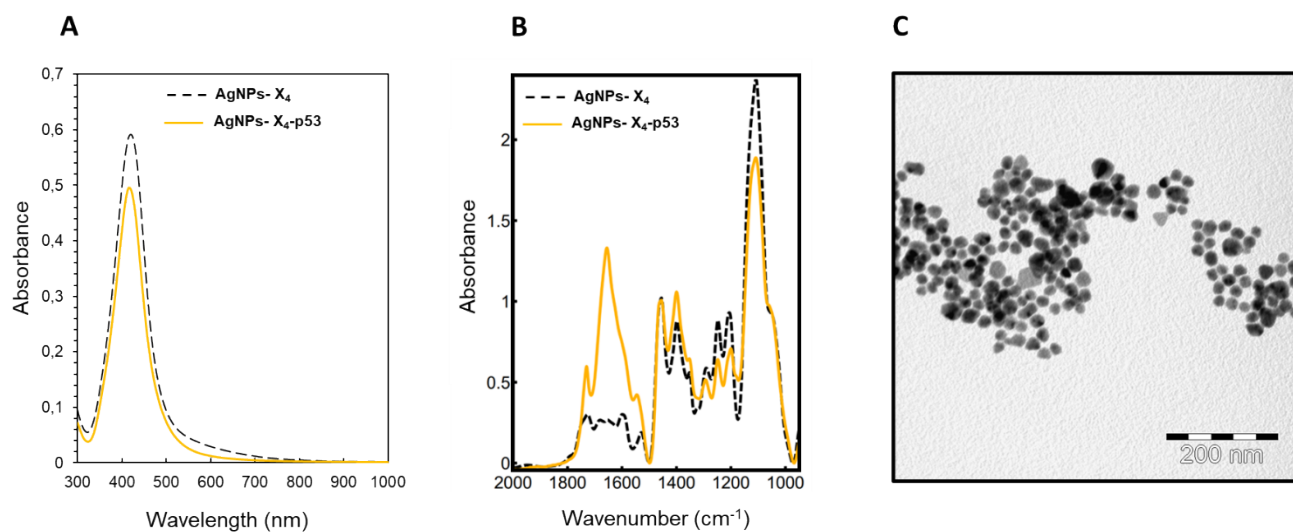

**Figure S5.** (A) UV-Vis spectra recorded in water at pH 7 for AgNPs- $X_4$ , before and after the coupling of p53 (AgNPs- $X_4$ -p53). (B) ATR-FTIR spectra of AgNPs- $X_4$  (black dashed line) and AgNPs- $X_4$ -p53 (yellow plain line). (C) TEM image of AgNPs- $X_4$

**Table S2.** Composition of the different buffers attempted.

| Code Name | Buffer              | Proteins              | Polymers | Surfactants | Salts       | Others                 | Results                             |
|-----------|---------------------|-----------------------|----------|-------------|-------------|------------------------|-------------------------------------|
| B1        | 20 mM Tris.HCl pH 8 | 2% BSA                | /        | 0.1% T20    | 50 mM KCl   | /                      | FP                                  |
| B2        | 0.5X PBS            | 2% BSA                | /        | 0.1% T20    | /           | /                      | FP                                  |
| B3        | 1X PBS              | 5% BSA                | 1% PEG   | 0.2% T20    | /           | /                      | FP (-)                              |
| B4        | 0.5X PBS            | 5% BSA                | 1% PEG   | 0.5% T20    | /           | /                      | FP (+)                              |
| B5        | 1X PBS              | 5% BSA                | 1% PEG   | 0.05% T20   | /           | /                      | FP (-)                              |
| B6        | /                   | 0.2X SuperBlock       | 1% PEG   | 0.2% T20    | /           | /                      | FP (+)                              |
| B7        | /                   | 0.2X Casein           | 1% PEG   | 0.2% T20    | /           | /                      | FP (-)                              |
| B8        | 10 mM Borate pH 8.5 | 5% BSA                | 1% PEG   | 0.05% T20   | 150 mM NaCl | /                      | FP                                  |
| B9        | 10 mM TRIS.HCl pH 8 | 5% BSA                | 1% PEG   | 0.05% T20   | 150 mM NaCl | /                      | FP                                  |
| B10       | 0.1X PBS            | 5% BSA                | 1% PEG   | 0.05% T20   | /           | 5% trehalose           | FP (+)                              |
| B11       | 0.1X PBS            | 5% BSA                | 1% PEG   | 0.05% T20   | /           | 5% glycerol            | FP (+)                              |
| B12       | 1X PBS              | 10% BSA               | 1% PEG   | 0.05% T20   | /           | /                      | FP                                  |
| B13       | 1X PBS              | 5% BSA + 0.2X Casein  | 1% PEG   | 0.05% T20   | /           | /                      | FP(-)                               |
| B14       | 1X PBS              | 5% BSA                | 0.5% PEG | 0.05% T20   | /           | /                      | FP                                  |
| B15       | 1X PBS              | 5% BSA                | 2% PEG   | 0.05% T20   | /           | /                      | FP                                  |
| B16       | 1X PBS              | 5% BSA + 0.2X Casein  | 1% PEG   | 0.05% T20   | /           | /                      | FP (-)                              |
| B17       | 1X PBS              | 10% BSA + 0.4X Casein | 1% PEG   | 0.05% T20   | /           | /                      | No FP but no TP                     |
| B18       | 1X PBS              | 5% BSA                | 1% PVP   | 0.05% T20   | /           | /                      | FP (+)                              |
| B19       | 25 mM Tris.HCl pH 8 | 5% BSA                | 1% PEG   | 0.1% T20    | 200mM KCl   | 1 mM NaEDTA            | FP (-)                              |
| B20       | 25 mM Tris.HCl pH 8 | /                     | 1% PEG   | 0.1% T20    | 200mM KCl   | 1 mM NaEDTA            | FP (+)                              |
| B21       | 25 mM Tris.HCl pH 8 | 5% BSA                | /        | 0.1% T20    | 200mM KCl   | 1 mM NaEDTA            | FP (+)                              |
| B22       | 25 mM Tris.HCl pH 8 | /                     | /        | 0.1% T20    | 200mM KCl   | 1 mM NaEDTA            | FP (+)                              |
| B23       | 25 mM Tris.HCl pH 8 | 5% BSA                | 1% PEG   | 0.2% T20    | 200mM KCl   | 1 mM NaEDTA            | FP                                  |
| B24       | 25 mM Tris.HCl pH 8 | 5% BSA                | 1% PEG   | 0.1% T20    | 200mM KCl   | 2 mM NaEDTA            | FP                                  |
| B25       | 25 mM Tris.HCl pH 8 | 5% BSA                | 1% PEG   | 0.1% T20    | 200mM KCl   | 1 mM NaEDTA + 2 mM DTT | FP                                  |
| B26       | 25 mM Tris.HCl pH 8 | 5% BSA                | 1% PEG   | 0.1% T20    | 100mM KCl   | 1 mM NaEDTA            | FP                                  |
| B27       | 25 mM Tris.HCl pH 8 | 5% BSA                | 1% PEG   | 0.4% T20    | 100mM KCl   | 1 mM NaEDTA            | FP (+)                              |
| B28       | 25 mM Tris.HCl pH 8 | 5% BSA                | 1% PEG   | 2% NaDeOx   | 100mM KCl   | 1 mM NaEDTA            | No FP but NPs remains on the bottom |
| B29       | 25 mM Tris.HCl pH 8 | 5% BSA                | 1% PEG   | 2% NaDeOx   | 100mM KCl   | /                      | No FP but NPs remains on the bottom |
| B30       | 25 mM Tris.HCl pH 8 | 5% BSA                | 1% PEG   | 0.5% NaDeOx | 100mM KCl   | 1 mM NaEDTA            | No FP but no TP                     |
|           |                     |                       |          |             |             |                        |                                     |

|     |                     |        |        |                         |           |             |                                     |
|-----|---------------------|--------|--------|-------------------------|-----------|-------------|-------------------------------------|
| B31 | 25 mM Tris.HCl pH 8 | 5% BSA | 1% PEG | 5% NaDeOx               | 100mM KCl | 1 mM NaEDTA | No FP but NPs remains on the bottom |
| B32 | 25 mM Tris.HCl pH 8 | 5% BSA | 1% PEG | 2% NaDeOx + 0.05% T20   | 100mM KCl | 1 mM NaEDTA | No FP but NPs remains on the bottom |
| B33 | 25 mM Tris.HCl pH 8 | 5% BSA | 1% PEG | 0.1% NaDeOx             | 100mM KCl | 1 mM NaEDTA | FP                                  |
| B34 | 25 mM Tris.HCl pH 8 | 5% BSA | 1% PEG | 0.05% NaDeOx            | 100mM KCl | 1 mM NaEDTA | FP                                  |
| B35 | 25 mM Tris.HCl pH 8 | 5% BSA | 1% PEG | 1% T20                  | 100mM KCl | 1 mM NaEDTA | FP (+)                              |
| B36 | 25 mM Tris.HCl pH 8 | 5% BSA | 1% PEG | 0.25% NaDeOx + 0.1% T20 | 100mM KCl | 1 mM NaEDTA | No FP but no TP                     |
| B37 | 25 mM Tris.HCl pH 8 | 1% BSA | 1% PEG | 0.25% NaDeOx + 0.2% T20 | 100mM KCl | 1 mM NaEDTA | No FP and TP                        |
| B38 | 25 mM Tris.HCl pH 8 | 1% BSA | 1% PEG | 0.25% NaDeOx + 0.4% T20 | 100mM KCl | 1 mM NaEDTA | No FP and TP (+)                    |
| B39 | 25 mM Tris.HCl pH 8 | 1% BSA | 1% PEG | 0.25% NaDeOx + 0.1% T20 | 100mM KCl | 1 mM NaEDTA | No FP but no TP                     |
| B40 | 25 mM Tris.HCl pH 8 | 5% BSA | 1% PEG | 0.25% NaDeOx + 0.4% T20 | 100mM KCl | 1 mM NaEDTA | No FP and TP (++)                   |
| B41 | 25 mM Tris.HCl pH 8 | 5% BSA | 1% PEG | 0.3% NaDeOx + 0.4% T20  | 100mM KCl | 1 mM NaEDTA | Similar as B40                      |
| B42 | 25 mM Tris.HCl pH 8 | 5% BSA | 1% PEG | 0.25% NaDeOx + 0.2% T20 | 100mM KCl | 1 mM NaEDTA | Similar as B40                      |
| B43 | 25 mM Tris.HCl pH 8 | 5% BSA | 1% PEG | 0.3% NaDeOx + 0.4% T20  | 200mM KCl | 1 mM NaEDTA | Similar as B40                      |
| B44 | 25 mM Tris.HCl pH 8 | 5% BSA | 1% PEG | 0.25% NaDeOx + 0.2% T20 | 200mM KCl | 1 mM NaEDTA | Similar as B40                      |

#### Abbreviations:

**T20**= Tween 20    **NaDeOX**= Sodium deoxycholate

**PVP**= PVP K15    **PBS**= Phosphate Buffer Saline

**PEG**= PEG6000    **BSA**= Bovine Serum Albumin

#### Results:

*Optimization was an iterative process. buffer list separated by thick black line correspond to the different optimization phase. Yellow colored buffers are the buffer composition reference for the following phase. Green colored buffer is the most optimal buffer composition.*

**FP**= False Positive    **TP**= True Positive

*Intensity of signal (FP or TP) are expressed as (+) for an increase and (-) for a decrease compared to reference buffer of the phase*

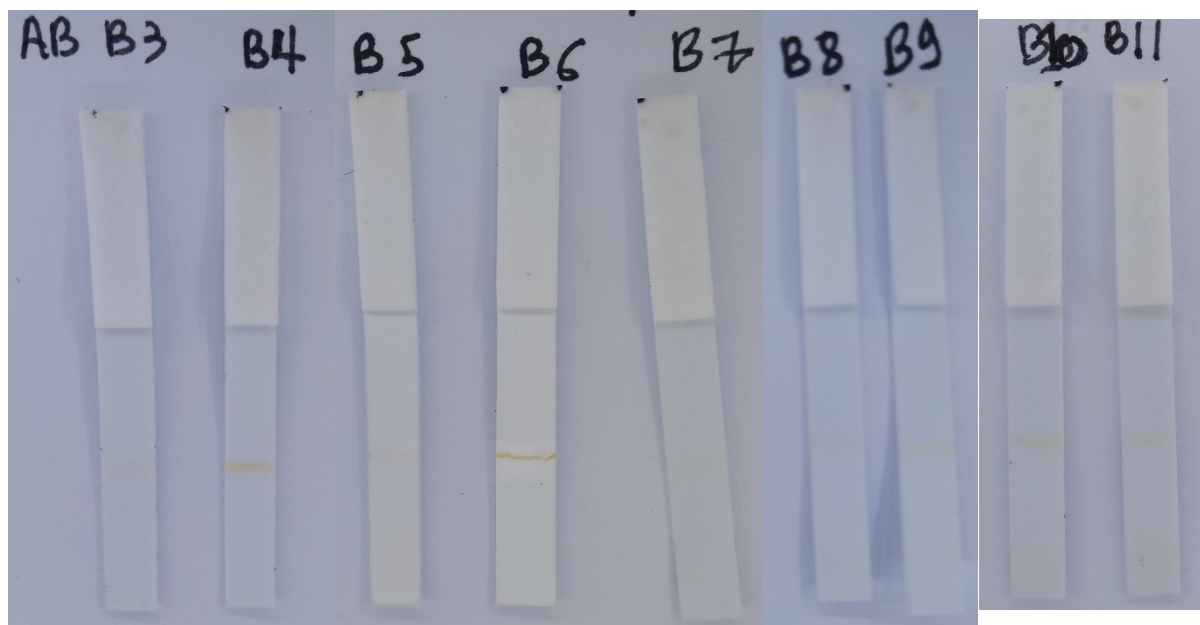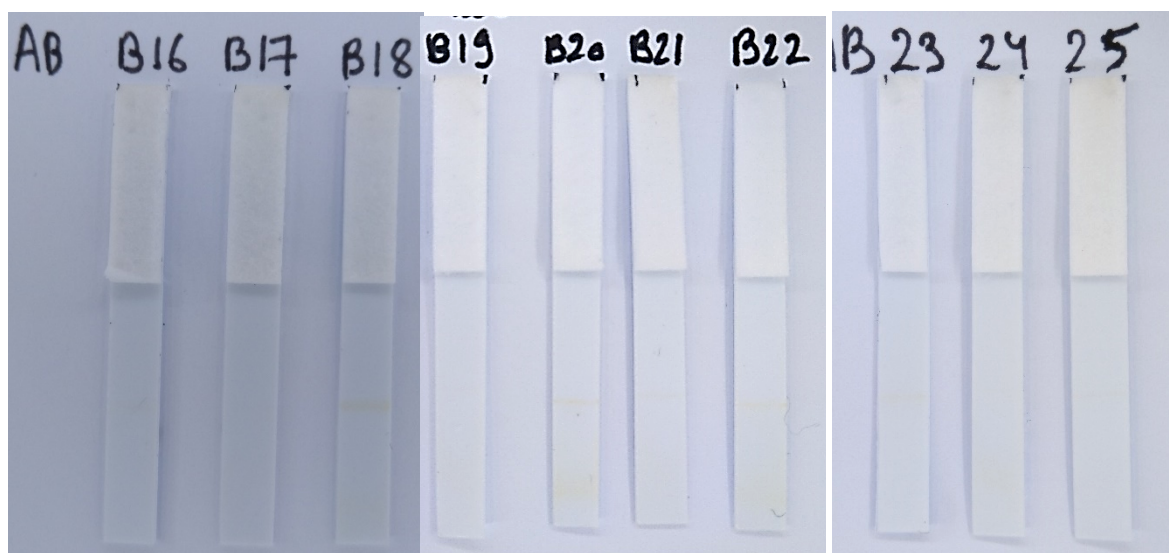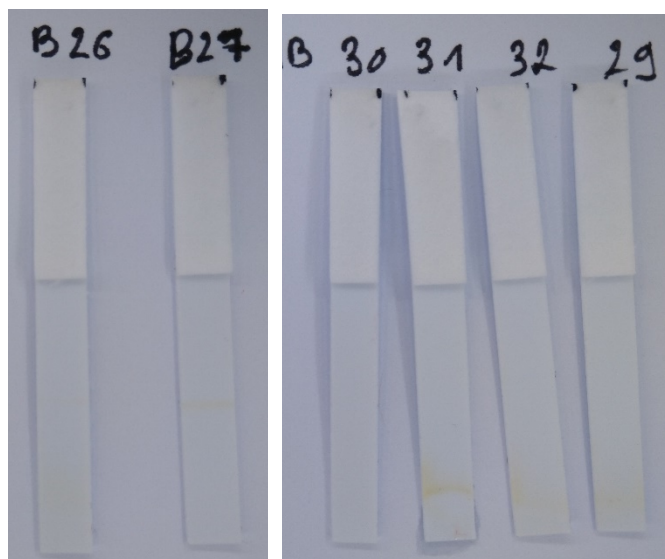

**Figure S6.** Picture of half strip without Mdm2 with different buffer composition

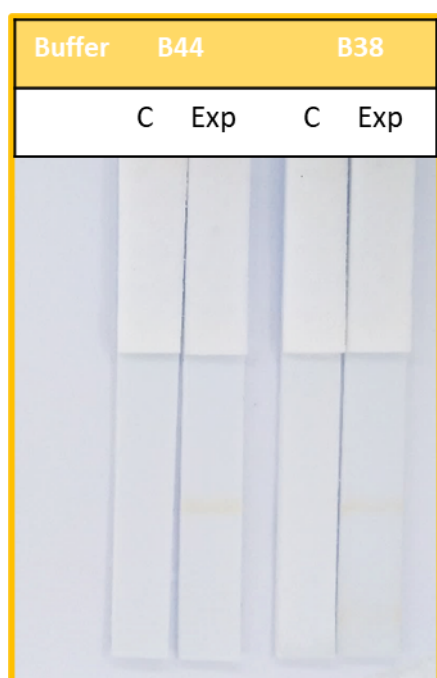

C = Control without Mdm2  
Exp= 8 nM Mdm2

**Figure S7.** Picture of p14-BSA with and without Mdm2 for Buffer B44 and B38.

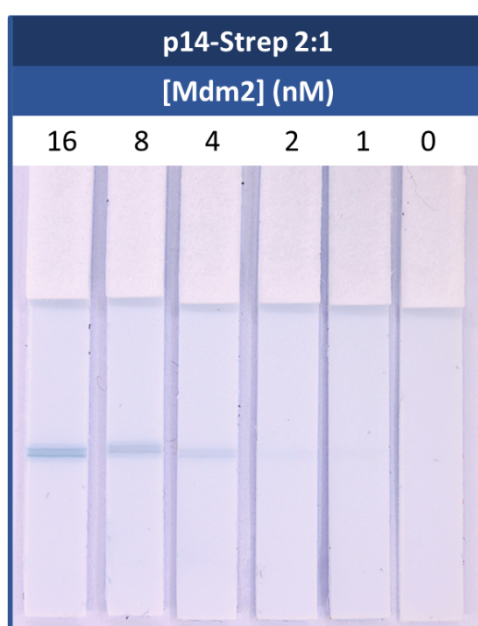

**Figure S8.** Pictures of the p14-Strep 2:1 strip used to detect different concentrations of Mdm2 ranging from 16 nM to 0 nM with AgNPLs-X<sub>4</sub>-p53.

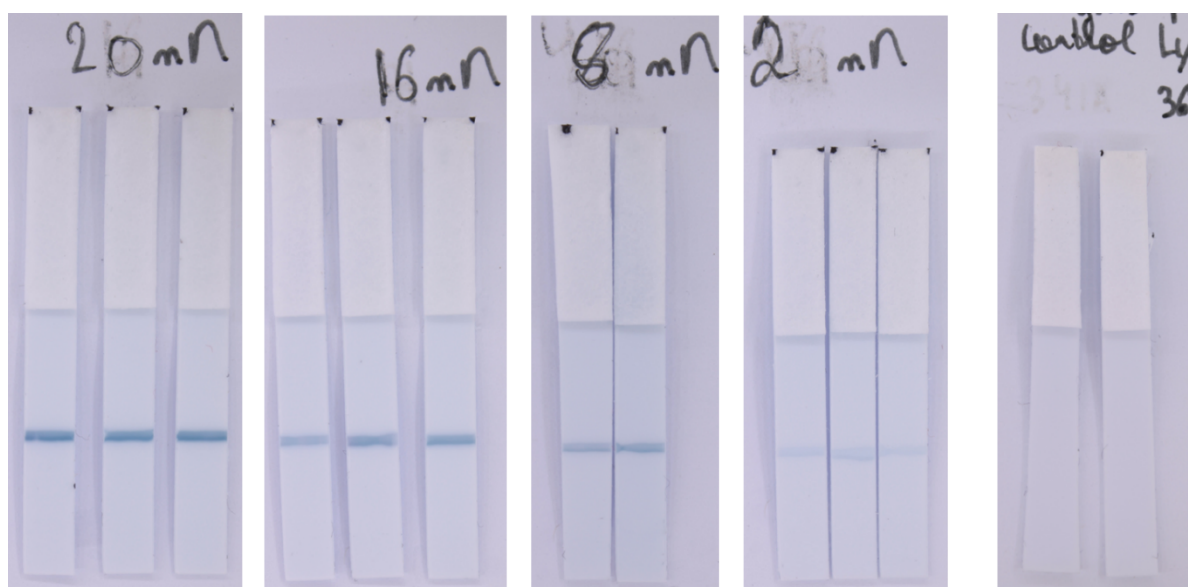

**Figure S9.** Picture of the replicates dipstick assays as a function of different concentrations of Mdm2 spiked in HEK293 cell lysate.

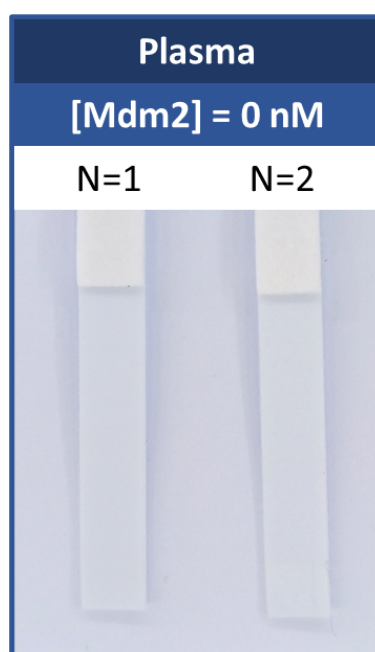

**Figure S10.** LFA Picture of p14-BSA strip with AgNPLs- AgNPLs-X<sub>4</sub>-p53 in absence of Mdm2 run in human plasma.

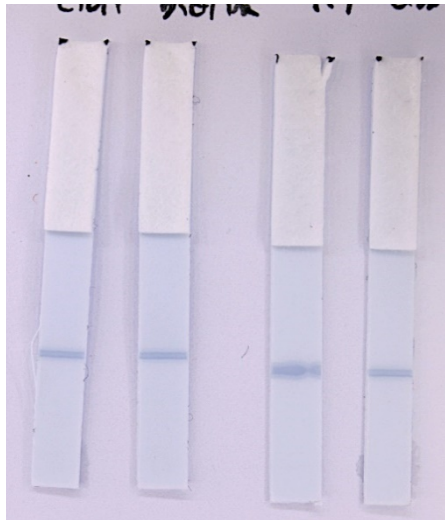

**Figure S11.** Pictures of different dipstick assays with a test line composed of p14-Strep 2:1 with negative cell lysate. Different optimizations were tested: (1) addition of EtOH (2) addition of biotin excess to block remaining available binding site (3) use strip with a p14: Strep ratio of 4:1 to avoid remaining available binding site (4) classical conditions. As observed, no significant improvement of the false positive were obtained.

### Bioconjugation Protocol:

In a 1.5 mL glass vial, 1000  $\mu$ L AgNPls- $X_4$  was added. Then, 100  $\mu$ L of MES buffer (100mM, pH 5.8), 60  $\mu$ L EDC.HCl (6 mM) and 60  $\mu$ L Sulfo-NHS (10 mM) were successively added. The mixture is stirred during 1 hours. Then, 20  $\mu$ L anti-Mdm2 pAB (2 mg/mL) was added. Mixture was stirred 4h at room temperature. The mixture was transferred in a 1.5 mL Protein Lobind Eppendorf. the Eppendorf was completed to 1.5 mL with BSA 1% to block surface and centrifugated at 18000 g during 20' at room temperature. The supernatant was discarded and the pellet was redispersed in BSA 1%. Centrifugation and redispersion cycle were repeated twice as described. Note that for the last cycle, the resulting nanoparticles were resuspended in 5 mM phosphate buffer (pH 7).

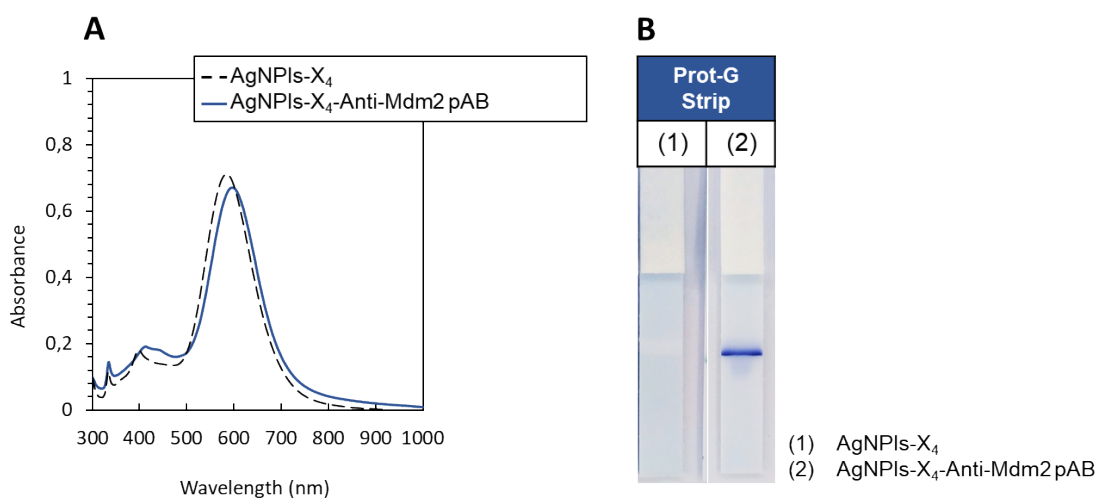

**Figure S12.** (A) UV-Vis spectra recorded in phosphate buffer at pH 7 for AgNPls- $X_4$ , before and after the coupling of anti-Mdm2 pAB. (B) Pictures of different dipstick assays with a test line composed protein G (Prot-G) to confirm presence of antibodies at the surface of AgNPls- $X_4$ . Protein G has high binding affinity for heavy chain of antibodies and, therefore, presence of antibodies at the AgNPls surface immobilizes the AgNPls a T line, leading to a positive blue line.

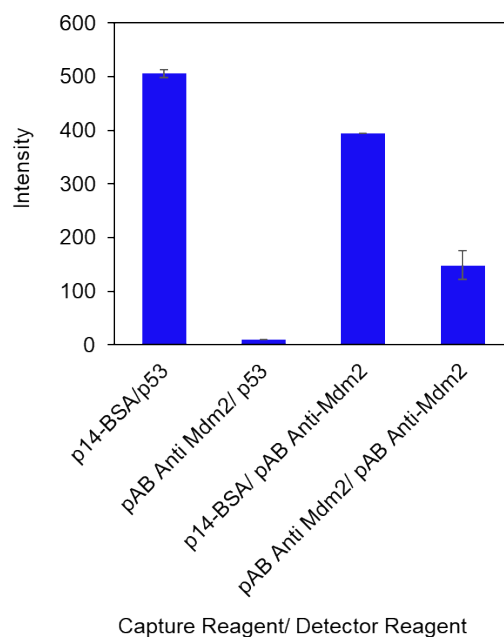

**Figure S13.** Signal quantification from the pictures of the dipstick assays using the ImageJ software with a test line composed of either p14-BSA or Anti-Mdm2 pAB as capture reagent and either AgNPLs-

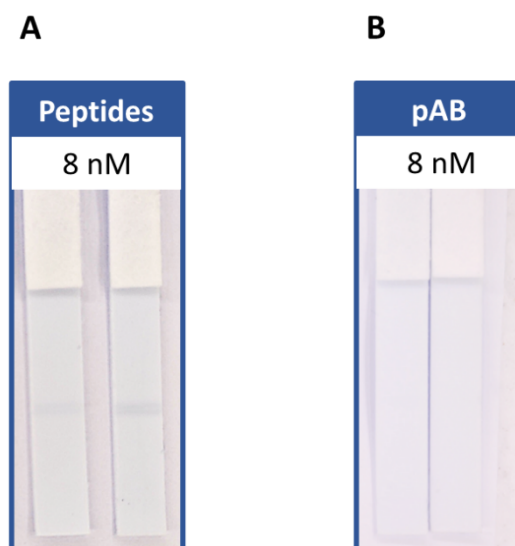

X<sub>4</sub>-p53 or AgNPLs-X<sub>4</sub>-Anti-Mdm2 pAB in the presence (final concentration of 8 nM).

**Figure S14.** (A) Pictures of the 1-year old p14-BSA strip with 1 year-old AgNPLs-X<sub>4</sub>-p53 in presence of 8nM Mdm2 in duplicates (B) Pictures of the 1-week old Anti-Mdm2 pAB strip with 1 week-old AgNPLs-X<sub>4</sub>-Anti-Mdm2 pAB in presence of 8nM Mdm2 in duplicates.

| Ratio | Streptavidin (19 $\mu$ M) | p14-biotin (266 $\mu$ M) | H <sub>2</sub> O : Acetonitrile (3:1) |
|-------|---------------------------|--------------------------|---------------------------------------|
| 0:1   | 100 $\mu$ L               | 0 $\mu$ L                | 29 $\mu$ L                            |
| 1:1   | 100 $\mu$ L               | 7.2 $\mu$ L              | 21.8 $\mu$ L                          |
| 2:1   | 100 $\mu$ L               | 14.5 $\mu$ L             | 14.5 $\mu$ L                          |
| 3:1   | 100 $\mu$ L               | 21.7 $\mu$ L             | 7.3 $\mu$ L                           |
| 4:1   | 100 $\mu$ L               | 29 $\mu$ L               | 0 $\mu$ L                             |

**Table S3.** Volume of reagents to obtain different ratio of p14 Biotin:Streptavidin.
